# Supplementary material for: The evolution of deep convective systems and their associated cirrus outflows
Source: Copernicus journal article supplement (doi:10.5194/acp-23-14239-2023), 2023-11-16
Supplement: Supplementary file 1 [file acp-23-14239-2023-supplement.pdf]

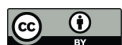

*Supplement of*

## **The evolution of deep convective systems and their associated cirrus outflows**

**George Horner and Edward Gryspeerd**

*Correspondence to:* George Horner (g.horner20@imperial.ac.uk)

The copyright of individual parts of the supplement might differ from the article licence.

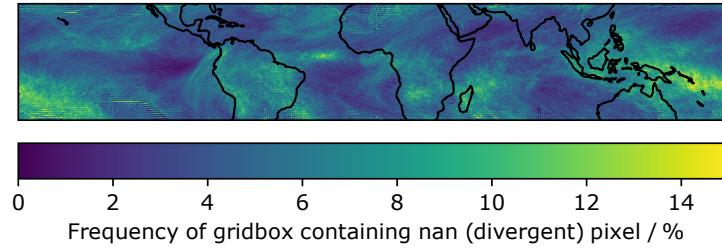

Figure S1: Frequency of gridboxes containing a divergent pixel. Highest areas of divergence are in convective regions in the maritime continent, due to divergent winds in this region of active convection.

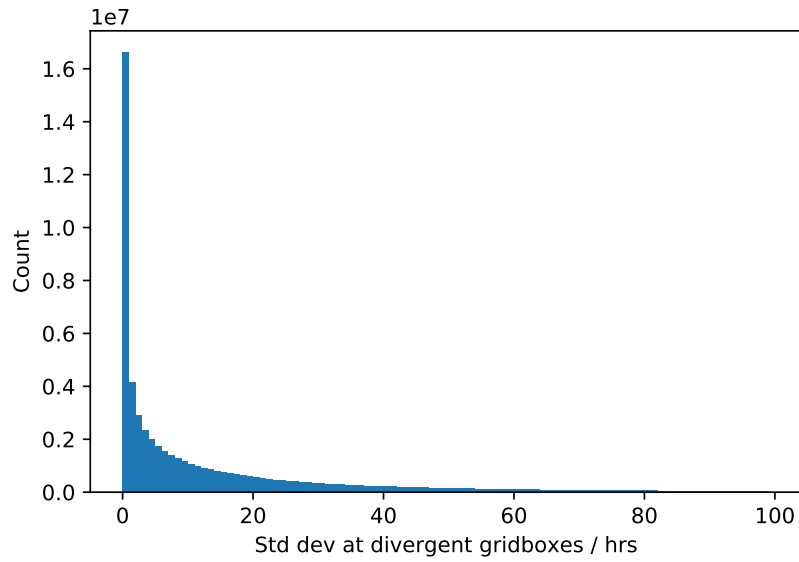

Figure S2: Histogram of the standard deviation of pixels surrounding a divergent gridbox.

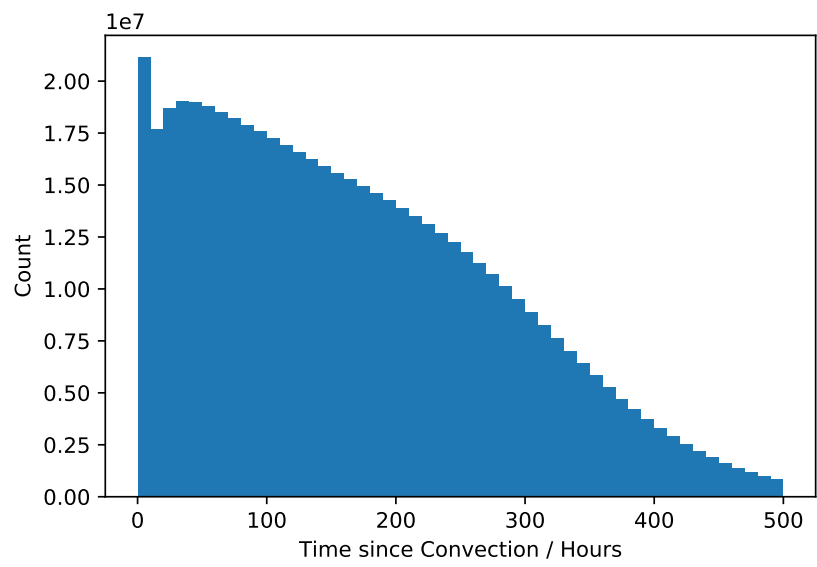

Figure S3: Histogram of the TSC distribution for 2007-2010.
